# Supplementary material for: Physiological Responses of Robinia pseudoacacia and Quercus acutissima Seedlings to Repeated Drought-Rewatering Under Different Planting Methods
Source: Front Plant Sci. 2021 Dec 6;12:760510. doi: 10.3389/fpls.2021.760510 (PMC8685255; doi:10.3389/fpls.2021.760510)
Supplement: Supplementary file 2 [file Data_Sheet_2.xlsx]

## Sheet: Height
cm		1	2	3	4	5	6	7
RR	CK	90.5	125.5	139.75	151.55	183.7	208.55	239.9
		95	126.6	140.3	150.9	171.25	203.25	232
		93.2	112.25	123.45	138.8	172.1	198.85	228.3
		83.05	107.85	121.85	131.65	144	168.35	195.95
	D		97.95	97.75	94.95	86.85	73.2	59.3
			92.3	103.85	100.85	95.75	79.5	67.85
			83.35	99	96.6	88.55	77.75	67.3
			100.8	105.55	102.9	102.4	88.6	74.4
	R			105.4	111.5	128.3	141.65	162.6
				108.85	111.3	119.3	140.15	166.7
				100.9	106.25	117.1	135.85	152.4
				103.6	108.9	116.55	132.9	155.5
QQ	CK	23.35	24.2	24.35	25.75	32.05	37.1	41.85
		24.5	25.7	26.2	26.6	34.05	37.45	43.2
		20.15	26	28.7	30	32	37.8	44.2
		30.6	36.8	36.95	37.75	38.35	44.65	51.1
	D		15.15	15.5	15.5	15.85	14.05	12.4
			23.15	28.65	28.75	29.1	24.8	21.95
			23.85	20.3	19.85	20.25	16.8	14.1
			17.6	25.85	25.9	26.2	22	18.85
	R			25.5	25.85	27.95	31.95	36.75
				21.55	21.95	24.85	27.7	31.45
				16.2	16.75	17.7	20.4	23.8
				23.75	24.1	25.15	29.3	35.05
RQ	CK	86.5	125	172.7	188	196.3	227.7	261.9
		40.5	91	134.8	176.2	185.1	216.6	244.8
		101.4	128.3	151	161.3	187.9	223.6	257.1
		68.5	103.5	140.2	143.6	158	186.4	208.8
	D		100.7	108	107.7	109.3	94	78
			92.2	91	91.2	92.9	78	66.3
			85	89.5	89.3	90.3	74.9	67.4
			80	106	106	107.5	89.2	80.3
	R			115.2	119.2	137	163	192.3
				107.4	111.2	129.5	142.5	163.9
				99	99	110.4	131.4	144.5
				92.3	93.8	104.3	119.9	135.5
QR	CK	22.7	26.3	27.1	34.4	40	47.6	54.7
		27	36	39	48.9	57.8	64.2	72.5
		25.1	27.5	31	44.6	53.9	64.7	77
		25.8	33.5	33.8	52.2	54	62.1	73.9
	D		24	23.1	23.7	25.4	20.6	17.7
			19.6	25.7	26.5	28.5	23.9	19.4
			17	26	27.9	29.2	24.5	21.6
			21.4	21.6	21.7	23.4	19	16
	R			20.7	21	27.5	32.5	38
				16.5	18.2	24.1	28.4	32.7
				32.2	33.8	36.2	40.5	44.6
				19.3	20.8	25.5	28.1	33.4

## Sheet: Basal diameter
mm		1	2	3	4	5	6	7
RR	CK	7.305	10.885	13.88	17.7	18.215	18.565	19.22
		7.935	11.3	12.18	13.205	13.275	13.275	13.47
		7.34	9.355	11.705	14.78	15.405	15.74	16.525
		6.95	9.005	11.87	15.915	16.145	16.56	16.73
	D		7.39	8.345	10.905	9.91	9.705	8.985
			8.315	9.5	10.96	9.535	9.26	8.545
			7.41	8.145	9.04	7.58	7.385	7.195
			7.2	8.83	10.89	9.68	9.06	9.02
	R			10.61	10.71	11.345	11.735	11.96
				12.945	13.15	13.63	14.31	14.59
				10.565	10.895	11.515	11.575	11.805
				11.575	11.875	12.525	12.6	12.935
QQ	CK	3.35	3.45	3.955	4.555	4.805	4.97	5.16
		3.445	3.85	4.22	4.635	4.78	4.875	4.945
		3.085	3.53	4.15	4.88	5.175	5.385	5.57
		4.305	4.51	4.775	5.055	5.22	5.4	5.455
	D		2.135	2.4	2.705	1.905	1.775	1.65
			2.27	2.27	2.28	1.94	1.785	1.68
			2.635	2.55	2.525	1.78	1.77	1.64
			1.81	2.245	2.79	2.305	2.15	2.15
	R			2.87	3.185	3.92	4.075	4.2
				2.25	2.4	3.05	3.14	3.185
				2.81	3.43	3.65	3.785	3.86
				3.055	4.24	4.955	5.06	5.285
RQ	CK	9.75	13.26	16.32	19.91	20.44	21.26	21.9
		6.49	8.24	13.75	20.65	21.44	22.3	23.42
		8.56	10.87	14.76	17.42	17.66	18.37	19.29
		7.37	9.34	14.6	20.33	20.43	21.45	21.45
	D		7.94	9.16	10.57	8.69	7.99	7.91
			8.53	9.69	11.01	9.38	8.91	8.11
			8.54	9.29	10.11	9.48	9.01	8.11
			7.52	8.78	10.25	8.85	8.14	7.81
	R			7.72	8.98	9.62	9.91	10.01
				6.13	6.57	7.29	7.36	7.58
				9.75	11.39	11.8	11.92	12.04
				9.68	10.71	12.46	12.58	12.71
QR	CK	3.31	3.64	3.96	4.31	4.36	4.36	4.4
		3.67	4.04	4.29	4.56	4.96	5.16	5.21
		4.23	4.51	4.96	5.45	6.24	6.43	6.56
		4.39	4.8	5.23	5.7	5.95	6.07	6.19
	D		3.69	3.73	3.77	3.29	3.19	3.06
			3.53	3.61	3.69	3.58	3.22	3.03
			3.96	3.98	4	3.14	2.83	2.69
			3.53	3.59	3.65	3.44	3.1	2.98
	R			4.32	4.73	5.1	5.36	5.41
				4.1	4.75	4.76	5	5.05
				3.36	3.85	4.11	4.32	4.32
				4.04	4.05	4.37	4.54	4.59

## Sheet: Biomass
g		1			2			3			4			5			6			7
		Root	Stem	Leaf	Root	Stem	Leaf	Root	Stem	Leaf	Root	Stem	Leaf	Root	Stem	Leaf	Root	Stem	Leaf	Root	Stem	Leaf
RR	CK	12.56	15.23	20	16.89	15.59	19.84	12.12	13.21	19.13	18.58	25.95	25.07	24.87	38.04	29.11	27.06	39.2	26.11	27.86	25.13	21.41
		12.4	17.28	14.5	14.61	14.36	18.07	15.11	19.4	19.36	18.95	25.54	23.01	31.14	42.78	32.02	25.14	49.22	20.93	34.11	45.78	24.05
		11.67	13.99	18.55	11.64	14.28	18.72	11.54	13.14	16.62	11.21	14.35	16.22	29.38	31.78	25.26	26.29	34.94	26.6	37.51	44.33	31.77
		12.21	19.81	22.48	14.38	14.74	18.88	12.92	15.25	18.37	16.4	21.95	21.43	31.63	39.63	27.41	32.18	36.33	29.51	33.16	38.41	25.74
	D				13.64	13.24	15.2	11.32	12.31	8.04	12.3	12.83	9.19	14.15	13.94	8.56	9.04	16.88	9.23	12.79	20.01	9.1
					14.56	16.72	15.08	12.56	15.58	9.54	15.28	15.64	10.44	11.36	17.71	9.87	11.38	14.94	7.46	9.5	17.44	7.43
					12.45	13.11	14.44	12.76	15.33	10.51	12.83	11.96	8.44	8.91	12.95	7.24	12.41	14.57	8.08	11.6	19.28	9.06
					13.55	14.35	14.9	12.21	14.41	9.36	13.47	18.59	22.43	11.47	14.87	8.56	10.95	15.46	7.27	11.3	18.91	8.53
	R							12.9	19.89	8.22	12.27	14.83	16.51	13.63	17.47	10.46	11.07	15.3	7.75	11.92	17.76	10.99
								13.08	15.17	9.78	11.77	15.14	8.94	13.47	17.22	11.54	14.53	14.49	10.05	10.64	14.43	8.84
								10.08	11.18	11.22	10.97	18.49	10.48	11.43	15.69	11.36	14.22	13.61	8.42	13.11	16.73	8.69
								12.02	15.41	9.74	11.67	16.15	11.98	12.84	16.79	11.12	13.27	14.47	8.74	11.89	16.31	9.51
QQ	CK	3.18	2.47	3.09	2.54	1.59	2.37	3.4	1.67	2.72	2.69	1.5	2.22	3	1.66	1.71	2.17	2.58	2.41	4.84	2.22	2.78
		2.81	2.39	3.02	2.27	1.67	2.46	2.92	1.75	2.92	2.46	1.66	2.91	4.08	2.05	2.1	3.37	2.28	2.74	3.96	2.58	3.12
		2.52	2.43	3.1	3.4	1.87	3.61	2.65	1.57	2.38	3	1.72	2.73	3.42	2.06	2.31	2.92	3.9	6.19	5.35	2.54	2.87
		2.56	2.28	2.2	2.46	1.51	2.36	3.37	1.87	3.05	1.94	1.63	1.89	4.26	1.87	2.34	3.36	2.06	2.8	4.28	3.65	4.19
	D				1.59	1.37	1.63	2.42	1.52	2.11	2.2	1.8	2.36	2.72	1.6	2.1	2.66	1.65	1.74	3.4	2.24	2.28
					3.1	1.74	2.63	2.07	1.64	2.23	2.29	1.72	2.62	2.11	1.72	2.14	2.35	2.09	2.19	2.22	2.02	1.86
					2.25	1.51	2.13	2.09	1.41	2.03	1.67	1.3	1.63	3.25	1.79	2.14	2.63	1.8	2.19	2.55	1.81	1.75
					2.23	1.58	2.42	2.2	1.74	2.5	1.72	1.4	1.74	3.93	1.91	2.2	2.49	1.61	2.16	2.81	2.09	2.14
	R							2.58	2.83	2.25	2.35	1.65	2.23	2.01	1.66	2.44	3.25	2.43	2.7	4.02	2.22	2.59
								2.66	1.7	2.25	2.44	1.56	2.22	3.88	1.61	2.35	2.08	2.14	2.88	4.78	2.25	3.2
								2.19	2.83	3.47	3.77	2.04	3.73	2.44	1.44	2.19	2.49	1.82	2.1	4.22	3.25	2.74
								2.12	1.52	3.38	4.11	1.61	2.62	1.9	1.61	2.52	3.82	2.47	2.27	4.57	3.81	3.72
RQ	CK	5.54	21.74	4.65	24.14	27.87	33.84	23.93	20.99	27.19	6.47	56.27	48.86	60.39	58.58	46.73	6.82	72.41	49.29	68.54	61.11	41.79
		14.84	15.5	4.47	23.02	30.11	32.52	20.9	25.93	33.28	32.88	53.47	42.05	62.12	80.01	60.78	50.46	96.55	48.8	67.32	87.91	54.48
		17.62	19.3	3.6	31.15	27.41	32.12	26.23	30.03	32.76	45.95	60.88	39.77	41.94	95.36	51.25	44.93	48.29	36.93	52.65	79.71	46.99
		18.44	29.09	5.01	19.44	28.46	32.83	17.02	25.65	31.08	27.4	33	41.31	55.36	45.26	37.73	44.81	41.33	24.87	45.46	96.05	50.81
	D				13.84	17.16	18.45	23.41	19.34	16.23	23.48	31.36	19.43	13.48	25.47	18.67	13.9	24.46	14.78	23.74	28.83	17.85
					22.2	22.31	20.83	20.13	27.15	20.42	22.5	26.18	15.55	14.84	29.71	18.03	16.6	29.45	14.36	16.2	31.35	14.82
					18.24	21.42	23.66	24.48	31.85	22.94	23.22	22.32	17.06	18.21	18.15	14.05	19.41	29.57	14.39	24.32	30.06	17.95
					32.14	37.17	21.48	19.63	23.4	15.2	23.27	35.9	18.12	16.51	25.38	17.62	23.71	24.33	14.51	21.16	33.04	17.87
	R							4.12	25.78	20.89	23.86	23.95	21.74	23.83	27.57	17.49	14.29	19.6	16.33	24	25.23	18.84
								25.05	27.95	17.45	21.11	24.1	23.12	20.62	21.34	15.73	17.27	24.28	15.76	22.97	27.22	17.82
								19.99	33.93	16.59	18.77	20.7	20.41	18.44	24.25	17.3	13.84	25.17	16.22	22.14	23.32	15.32
								18.72	22.82	19.4	15.65	17.79	20.37	22.04	31.66	18.48	16.48	24.76	18.51	20.16	25.24	15.5
QR	CK	5.21	4.29	5.38	6.44	3.77	5.07	5.04	2.79	3.34	5.07	3.43	5.04	6.82	3.74	4.27	7.8	4.41	6.76	7.25	3.93	4.56
		2.09	5.36	5.55	4.65	3.13	4.74	3.34	3.27	4.61	4.08	3.26	3.83	5.2	3.64	4.86	4.94	3.38	3.59	6.95	4.88	4.46
		4.34	4.64	4.83	5.24	3.74	4.98	3.88	2.93	4.5	5.15	3.11	4.29	6.82	3.83	4.85	7.23	6.38	7.29	7.06	4.86	5.9
		3.66	7.4	6.43	6.11	3.55	4.93	8.75	3	4.15	4.76	2.9	4.07	6.4	3.73	3.96	5.67	3.77	4.81	7.04	3.79	4.67
	D				3.13	2.83	4.52	2.65	2.83	3.95	3.24	2.47	3.23	2.02	2.88	3.55	3.36	3.47	3.9	20.39	3.3	4.02
					3.5	2.82	3.51	3.16	2.6	2.97	3.62	2.49	3.18	3.31	2.66	2.43	3.9	3.14	3.77	3.85	3.32	4.14
					3.06	2.56	3	3.97	2.78	3.88	3.39	2.7	3.51	3.83	2.46	3.06	3.33	3.43	4.09	3.82	3.11	3.76
					3.33	2.91	4.22	2.81	2.56	2.63	3.29	2.56	3.13	3.07	2.57	2.67	3.36	3.18	3.56	3.1	3.19	3.51
	R							5.24	2.96	4.36	4.31	3.34	3.64	4.29	3.52	4.22	5.24	3.23	3.51	5.22	3.13	3.04
								2.42	2.63	3.54	4.24	2.77	3.12	3.61	3.42	4.06	4.61	3.24	3.7	3.28	3.34	3.2
								4.38	2.99	3.41	3.66	2.7	3.34	5.33	3.66	4.9	5.86	3.47	4.33	6.59	4.24	4.34
								3.61	2.86	3.26	3.16	2.77	3.14	4.61	3.3	3.34	3.79	3.42	4.35	4.59	3.33	3.73

## Sheet: Water Potential
MPa		1	2	3	4	5	6	7
RR	CK	-0.08	-0.035	-0.02	-0.05	-0.045	-0.06	-0.075
		-0.085	-0.065	-0.09	-0.065	-0.035	-0.06	-0.075
		-0.04	-0.03	-0.055	-0.015	-0.065	-0.02	-0.02
		-0.04	-0.02	-0.09	-0.025	-0.02	-0.065	-0.03
	D		-6.69	-8.045	-10	-10	-10	-10
			-7.225	-8.09	-10	-10	-10	-10
			-6.69	-8.09	-10	-10	-10	-10
			-5.995	-8.31	-10	-10	-10	-10
	R			-2.955	-0.075	-7.075	-2.075	-0.05
				-2.635	-0.085	-7.085	-2.03	-0.02
				-3.025	-0.095	-7.095	-2.05	-0.01
				-3.055	-0.04	-7.04	-2.035	-0.09
QQ	CK	-0.735	-0.435	-0.285	-0.205	-0.25	-0.025	-0.085
		-0.62	-0.68	-0.205	-0.065	-0.035	-0.05	-0.075
		-0.235	-0.26	-0.495	-0.285	-0.275	-0.01	-0.03
		-0.385	-0.505	-0.31	-0.01	-0.36	-0.065	-0.065
	D		-8.575	-8.845	-9.545	-10	-10	-10
			-8.415	-8.61	-9.98	-10	-10	-10
			-8.875	-8.815	-9.655	-10	-10	-10
			-8.215	-9.15	-9.835	-10	-10	-10
	R			-6.875	-0.89	-7.46	-3.035	-0.075
				-5.99	-0.865	-7.515	-3.065	-0.06
				-5.405	-0.295	-7.92	-3.025	-0.045
				-6.98	-0.57	-7.255	-3.065	-0.02
RQ	CK	-0.07	-0.09	-0.06	-0.08	-0.03	-0.04	-0.06
		-0.05	-0.04	-0.08	-0.06	-0.05	-0.06	-0.09
		-0.07	-0.03	-0.08	-0.09	-0.02	-0.08	-0.08
		-0.03	-0.08	-0.09	-0.08	-0.03	-0.05	-0.09
	D		-6.75	-4.82	-6.71	-10	-10	-10
			-4.38	-7.57	-8.39	-10	-10	-10
			-6.73	-8.29	-8.61	-10	-10	-10
			-6.33	-4.55	-8.49	-10	-10	-10
	R			-3.37	-0.01	-3.01	-0.02	-0.02
				-3.18	-0.03	-3.01	-0.06	-0.07
				-2.12	-0.05	-3.02	-0.01	-0.08
				-2.43	-0.05	-3.03	-0.03	-0.06
QR	CK	-0.7	-0.44	-0.21	-0.65	-0.61	-0.1	-0.06
		-0.57	-0.33	-0.27	-0.75	-0.98	-0.06	-0.07
		-0.81	-0.63	-0.53	-0.94	-0.25	-0.08	-0.06
		-0.3	-0.43	-0.16	-0.93	-0.99	0	-0.05
	D		-6.92	-6.62	-7.51	-8.845	-10	-10
			-6.43	-7.35	-6.73	-8.61	-10	-10
			-5.99	-8.47	-6.44	-8.815	-10	-10
			-7.23	-6.44	-6.7	-9.15	-10	-10
	R			-4.13	-1.02	-4.13	-0.08	-0.05
				-4.86	-1.85	-4.55	-0.08	-0.06
				-7.33	-1.65	-4.16	-0.09	-0.08
				-4.9	-1.38	-4.38	-0.01	-0.1

## Sheet: Hydraulic conductivity
× 10-1 kg m-1 s-1 MPa-1		1	2	3	4	5	6	7
RR	CK	12.14	15.84	15.52	9.52	11.2	11.06	10.75
		15.47	11.97	20.54	17.78	18.72	19.5	19.03
		19.46	25.34	21.71	14.54	15.25	14.69	13.6
		16.95	25.59	21	13.42	12.62	11.94	11.88
	D		15.8	16.04	0	0	0	0
			6.84	10.23	0	0	0	0
			11.55	15.58	0	0	0	0
			14.88	12.71	0	0	0	0
	R			11.31	16.17	18.22	18.97	22.49
				9.89	11.11	12.72	12.9	14.11
				12.67	13.61	17.01	18.5	21.63
				11.14	17.67	15.72	16.88	19.28
QQ	CK	6.76	11.79	8.56	7.11	6.12	5.99	5.52
		5.72	9.33	8.28	6.57	5.89	5.6	5.45
		8.35	12.12	8.8	6.24	5.45	4.96	4.62
		7.95	7	6.59	5.88	5.87	5.48	5.48
	D		5.13	5.68667	2.39333	0	0	0
			5.7	6.12667	3.30333	0	0	0
			1.26	4.53	2.47333	0	0	0
			4.13	5.14333	2.15	0	0	0
	R			10.35	11.74	10.42	9.49	9.25
				13.95	17.38	15.75	15.18	14.53
				9.74	9.17	8.85	8.53	8.41
				9.02	5.82	5.24	5.05	4.65
RQ	CK	11.64	15.06	9.3	7.93	6	5.71	5.39
		22.51	21	14.83	6.53	5.67	4.99	4.4
		17.26	5.93	11.78	9.23	8.59	7.78	6.85
		16.61	6.87	11.37	6.61	7.02	6.24	6.3
	D		11.94	8.04	3.64	0	0	0
			10.64	4.54	2.33	0	0	0
			8.36	8.36	3.25	0	0	0
			12.96	9.33	5.01	0	0	0
	R			7.02	6.88	9.25	8.54667	8.54667
				11.8533	13.1167	14.7833	14.2167	13.1433
				5.04333	5.54667	5.47333	5.21	4.95667
				5.23	4.97333	6.65	6.59	6.27
QR	CK	14.05	12.13	10.31	8.52	9.17	8.82	8.49
		10.76	9.53	7.9	7.9	6.48	5.99	6.06
		7.86	8.22	6.23	5.08	3.61	3.47	3.4
		7.63	6.57	5.47	5.55	4.87	4.59	4.2
	D		7.07	6.38	6.62	6.66	6.75	7.19
			9.6	7.31	5.5	4.69	5.63	6.69
			9.24	5.9	5.71	6.91	8.59	9.32
			7.98	7.1	6.4	5.76	7.39	7.77
	R			5.53	5.87	7.55	7.04	6.85
				5.89	5.5	7.18	6.26	6.32
				7.39	9.75	12.33	10.63	11.19
				4.69	6.9	9.45	8.84	8.48

## Sheet: Net photosynthetic rate
µmol·m⁻²·s⁻¹		1	2	3	4	5	6	7
RR	CK	18.775	17.185	20.055	15.805	15.67	17.725	19.45
		15.47	15.245	14.2	16.875	17.205	18.21	19.68
		18.52	16.03	14.21	16.455	17.065	18.055	18.555
		16.73	14.35	11.815	18.72	17.36	18.28	17.135
	D		1.555	1.27	-1.775	-0.515	0	0
			1.055	-1.315	-0.555	-0.44	0	0
			0.905	0.12	-1.475	-0.265	0	0
			1.925	-0.345	-1.24	-0.22	0	0
	R			2.49	7.395	5.365	11.055	15.2
				0.85	10.775	5.84	9.39	16.985
				0.195	10.015	7.625	8.205	16.34
				0.38	9.795	6.655	7.83	18.56
QQ	CK	11.755	8.845	10.75	9.735	8.265	13.92	14.4
		9.095	10.365	12.435	9.435	8.525	13.82	12.07
		10.635	11.64	11.69	13.535	12.34	12.4	10.61
		11.93	10.675	11.1	13.075	10.1	11.88	13.085
	D		5.3	5.175	3.18	1.935	-0.07	-0.03
			2.67	4.16	3.315	2.86	-0.08	-0.035
			6.615	3.925	3.61	2.385	-0.07	-0.02
			3.925	4.285	1.93	2.375	-0.04	-0.035
	R			5.26	7.1	12.15	11.07	11.56
				5.875	8.975	14.125	8.855	11.465
				8.095	8.335	12.16	9.73	11.045
				5.46	8.13	11.26	10.385	11.69
RQ	CK	21.86	22.11	23.14	24.54	15.41	24.3	24.46
		15.38	18.87	18.41	21.84	24.05	24.03	19.96
		18.9	19.51	24.07	18.3	22.27	18.84	25.81
		18.39	17.47	19.22	24.91	23.7	20.78	19.44
	D		3.26	3.55	1.01	1.19	0	0
			2.48	3.38	1.27	-0.76	0	0
			3.74	3.54	2.67	0.04	0	0
			2.12	2.13	2.48	1.93	0	0
	R			10.36	23.99	19.74	20.63	19.77
				10.18	19.08	22.6	17.08	19.72
				8.74	17.2	22.24	18.89	21.54
				8.68	22.65	22.73	20.08	24.93
QR	CK	12.17	12.82	13.33	12.49	16.2	19.02	17.22
		15.28	13.48	14.92	19.5	15.08	16.79	14.33
		12.22	15.35	13.54	18.07	13.97	15.26	18.47
		12.3	13.41	10.99	20.56	13.59	17.2	18
	D		7.89	9.51	3.96	0.57	-0.13	-0.03
			6.88	7.05	1.27	0.27	-0.11	-0.05
			8.86	7.19	3.92	0.19	-0.12	-0.05
			6.5	7.36	2.21	-0.31	-0.04	0
	R			8	17.28	17.25	14.36	20.29
				10.91	17.87	16.94	16.49	20.5
				10.13	17.67	21.32	15.94	20.16
				10.5	20.4	15.62	13.51	19.03
